# Supplementary material for: The usefulness of balance test in preseason evaluation of injuries in amputee football players: a pilot prospective observational study
Source: PeerJ. 2024 Jan 5;12:e16573. doi: 10.7717/peerj.16573 (PMC10773449; doi:10.7717/peerj.16573)
Supplement: Data S1 [file peerj-12-16573-s001.xlsx]

## Sheet: 2023.04.06_Biodex_Zosia_dane ź
Player_ID	Lower leg injury	Group [prosthesis_ADL]	Injury y/n	Injury	Prosthesis in ADL	Number of injuries	Age [yrs]	Weight [kg]	Height [cm]	Club_ID	National team	Position	Type of disability	Uninjured limb	Dominant limb	Time from amputation [yrs]	Level of amputation	Level of AMP	Cause of amputation	Training [yrs]	Training frequency [times/week]	OSI one-leg static	AP one-leg static	ML one-leg static	OSI one-leg dynamic (8->4)	AP one-leg dynamic (8->4)	ML one-leg dynamic (8->4)	OSI SN one-leg dynamic (4)	WZsn	AP SN one-leg dynamic (4)	WZapsn	ML SN one-leg dynamic (4)	WZmlsn	OSI RU two-leg dynamic (8->4)	OSI two-leg static	AP two-leg static	ML two-leg static	OSI two-leg dynamic (8->4)	AP two-leg dynamic (8->4)	ML two-leg dynamic (8->4)
4	No	1	No	Injured players	Without prosthesis	0	30	83.2	167	2	No	Defender	Limb malformation	Left	Limb malformation	0	3	6	Limb malformation	0.5	1	2023-02-01	0.9	0.7	2023-07-02	2023-09-01	2023-06-01	2023-02-03	2023-09-03	2023-08-02	2023-07-03	1	2023-08-01
16	No	1	No	Non-injured players	Without prosthesis	0	26	79.1	171	2	No	Forwarder	Amputation	Left	Right	15	2	3	Cancer	0.5	4	0.6	0.4	0.3	0.5	0.4	0.3	0.6	2023-09-03	0.5	2023-07-03	0.3	2023-08-01
18	No	1	No	Non-injured players	Without prosthesis	0	48	82.5	173	1	No	Defender	Amputation	Right	Right	13	2	3	Traffic accident	1	2	2023-07-01	2023-01-01	2023-01-01	2	2023-02-01	2023-04-01	2023-07-01	2023-09-03	2023-01-01	2023-07-03	2023-02-01	2023-08-01
1	No	2	No	Non-injured players	With prosthesis	0	29	72.1	171	4	Yes	Mildfielder	Amputation	Right	Right	1	2	3	Traffic accident	0.5	1	1	0.6	0.7	2023-04-01	0.8	0.9	2023-04-01	2023-09-03	1	2023-07-03	1	2023-08-01	2023-02-02	0.5	0.3	0.2	2023-04-02	2023-07-01	2023-03-01
3	Yes	2	Yes	Non-injured players	With prosthesis	0	20	81.3	184	4	Yes	Forwarder	Limb malformation	Right	Limb malformation	0	3	6	Limb malformation	4	2	0.4	0.3	0.2	1	0.7	0.5	1	2023-09-03	0.8	2023-07-03	0.6	2023-08-01	0.9	0.4	0.3	0.2	2023-02-01	0.8	0.7
7	No	2	No	Non-injured players	With prosthesis	0	19	81.2	167	2	No	Mildfielder	Amputation	Right	Right	9	1	2	Other	0.5	1	0.7	0.5	0.4	2023-09-01	2023-05-01	0.9	2023-06-01	2023-09-03	2023-03-01	2023-07-03	0.9	2023-08-01	2023-04-01	2023-06-03	2023-01-02	2023-09-02	2023-01-03	2023-05-02	2023-04-01
10	No	2	No	Non-injured players	With prosthesis	0	33	74.8	168	2	No	Mildfielder	Amputation	Left	Right	8	1	1	Traffic accident	0.5	1	0.7	0.5	0.4	2023-02-01	0.8	0.7	1	2023-09-03	0.7	2023-07-03	0.6	2023-08-01	2023-04-01	0.4	0.2	0.3	2023-02-02	2023-04-01	2023-05-01
11	No	2	No	Non-injured players	With prosthesis	0	26	90	101	4	Yes	Defender	Amputation	Right	Right	6	1	1	Cancer	3	2	0.6	0.4	0.3	2023-02-01	0.9	0.6	2023-03-01	2023-09-03	1	2023-07-03	0.8	2023-08-01	2023-02-01	0.3	0.2	0.1	2023-06-01	2023-01-01	0.9
13	No	2	No	Non-injured players	With prosthesis	0	38	109.6	182	1	No	Defender	Amputation	Right	Right	12	2	3	Traffic accident	2023-05-04	1	2023-03-02	2023-01-02	0.6	2023-03-04	2023-09-03	2023-05-01	2023-06-02	2023-09-03	2023-02-01	2023-07-03	2023-01-02	2023-08-01	2023-02-02	2023-06-04	0.2	2023-05-04	2023-06-01	0.9	2023-01-01
19	No	2	No	Non-injured players	With prosthesis	0	17	75	179	1	Yes	Mildfielder	Amputation	Right	Right	0	1	1	Traffic accident	2023-05-01	2	0.7	0.5	0.3	1	0.8	0.5	1	2023-09-03	0.9	2023-07-03	0.6	2023-08-01	0.9	0.7	0.3	0.6	1	0.6	0.6
21	No	2	No	Non-injured players	With prosthesis	0	29		171	4	Yes	Defender	Limb malformation	Right	Limb malformation	0	3	6	Limb malformation	5	2	0.5	0.3	0.3	0.5	0.3	0.3	0.7	2023-09-03	0.5	2023-07-03	0.5	2023-08-01	0.7	0.5	0.3	0.3	2023-01-01	0.7	0.7
22	No	2	No	Non-injured players	With prosthesis	0	38	106.1	180	1	Yes	Defender	Amputation	Right	Left	8	2	3	Traffic accident	5	2	0.5	0.3	0.3	1	0.7	0.5	1	2023-09-03	0.8	2023-07-03	0.6	2023-08-01	2023-04-01	0.3	0.2	0.2	2023-04-02	2023-06-01	2023-05-01
23	No	2	No	Non-injured players	With prosthesis	0	37	89.3	181	5	Yes	Defender	Amputation	Left	Left	8	1	1	Traffic accident	6	3	0.8	0.6	0.4	2023-01-01	0.8	0.7	2023-01-01	2023-09-03	0.9	2023-07-03	0.6	2023-08-01	2023-01-01	0.3	0.2	0.2	2023-04-01	1	0.7
2	Yes	1	Yes	Injured players	Without prosthesis	4	33	88.2	173	1	Yes	Defender	Amputation	Right	Right	5	2	3	Traffic accident	2023-05-05	3	0.8	0.5	0.5	3	2023-02-02	2023-07-01	2023-06-01	2023-09-03	2023-01-01	2023-07-03	1	2023-08-01
6	Yes	1	Yes	Injured players	Without prosthesis	2	16	52.7	171	5	Yes	Mildfielder	Limb malformation	Left	Limb malformation	0	3	6	Limb malformation	4	5	0.5	0.4	0.3	0.7	0.5	0.4	0.6	2023-09-03	0.4	2023-07-03	0.4	2023-08-01
8	No	1	Yes	Injured players	Without prosthesis	2	17	65.6	169	4	Yes	Forwarder	Limb malformation	Right	Right	12	1	1	Traffic accident	3	3	2023-05-01	0.9	2023-01-01	2023-01-01	0.9	0.5	1	2023-09-03	0.7	2023-07-03	0.6	2023-08-01
5	Yes	2	Yes	Injured players	With prosthesis	2	32	89.9	176	5	Yes	Mildfielder	Amputation	Right	Right	8	1	1	Traffic accident	6	3	0.5	0.4	0.3	0.7	0.5	0.3	0.8	2023-09-03	0.7	2023-07-03	0.5	2023-08-01	0.9	0.2	0.1	0.1	2023-02-01	0.7	0.9
9	No	2	Yes	Injured players	With prosthesis	1	28	77.8	180	3	Yes	Mildfielder	Amputation	Left	Limb malformation	5	1	1	Traffic accident	4	3	2023-02-01	0.5	1	2023-04-01	2023-01-01	0.7	2023-04-01	2023-09-03	0.9	2023-07-03	1	2023-08-01	2023-01-01	0.3	0.2	0.2	2023-06-01	2023-01-01	0.9
12	Yes	2	Yes	Injured players	With prosthesis	2	20	73.1	164	3	Yes	Forwarder	Limb malformation	Right	Limb malformation	0	3	6	Limb malformation	6	4	0.8	0.5	0.5	2023-04-01	1	0.9	2023-03-01	2023-09-03	0.9	2023-07-03	0.9	2023-08-01	2023-01-01	0.4	0.3	0.3	2023-07-01	1	2023-01-01
14	No	2	Yes	Injured players	With prosthesis	2	39	80.5	176	5	Yes	Forwarder	Amputation	Left	Right	7	1	5	Traffic accident	5	2	0.6	0.4	0.4	2023-02-01	0.9	0.6	0.9	2023-09-03	0.7	2023-07-03	0.6	2023-08-01	0.9	0.1	0.1	0.1	2023-05-01	2023-01-01	0.8
15	Yes	2	Yes	Injured players	With prosthesis	1	31	66.9	169	3	Yes	Defender	Amputation	Left	Left	30	1	1	Other	2	3	0.5	0.3	0.3	1	0.7	0.5	0.9	2023-09-03	0.6	2023-07-03	0.7	2023-08-01	0.8	0.4	0.3	0.2	2023-01-01	0.8	0.6
17	Yes	2	Yes	Injured players	With prosthesis	1	34	94.6	179	1	Yes	Defender	Amputation	Left	Right	4	2	3	Traffic accident	3	2	0.3	0.2	0.2	2023-04-01	0.9	1	2023-01-01	2023-09-03	0.8	2023-07-03	0.7	2023-08-01	2023-05-01	0.1	0.1	0.1	2023-04-02	2023-02-01	2023-08-01
20	Yes	2	Yes	Injured players	With prosthesis	1	27	54.3	168	2	Yes	Forwarder	Amputation	Left	Right	21	2	4	Cancer	2023-05-05	2	0.6	0.4	0.4	0.7	0.5	0.4	0.7	2023-09-03	0.6	2023-07-03	0.4	2023-08-01	0.7	0.3	0.2	0.1	1	0.7	0.5
24	Yes	2	Yes	Injured players	With prosthesis	1	31	82.1	175	3	Yes	Mildfielder	Amputation	Left	Right	5	2	3	Traffic accident	3	3	0.7	0.5	0.4	1	0.7	0.6	2023-02-01	2023-09-03	0.9	2023-07-03	0.7	2023-08-01	0.9	0.3	0.2	0.1	2023-04-02	2023-05-01	2023-07-01
25	Yes	2	Yes	Injured players	With prosthesis	1	31	76.6	180	1	Yes	Mildfielder	Amputation	Right	Right	7	2	3	Cancer	6	2	2023-02-01	0.8	0.6	2023-04-02	2023-08-01	2023-02-01	2023-09-02	2023-09-03	2023-06-02	2023-07-03	1	2023-08-01	2023-05-01	0.5	0.3	0.3	2023-04-02	2023-07-01	2023-02-01
